# Supplementary material
Source: Springer Nature journal article supplement (https://www.springermedizin.de/resource/supplementary/12958_2010_683_MOESM1_ESM.pdf/9568576)

# A Healthy Women

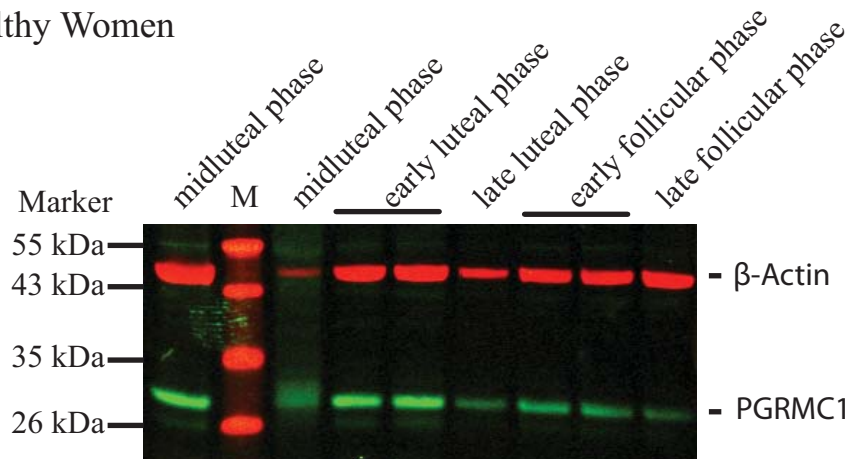

# B Patients and Controls

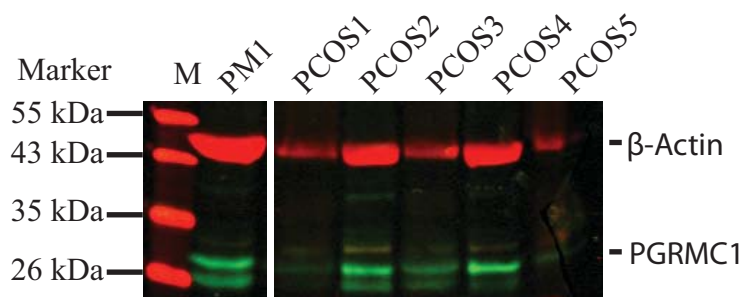

# C

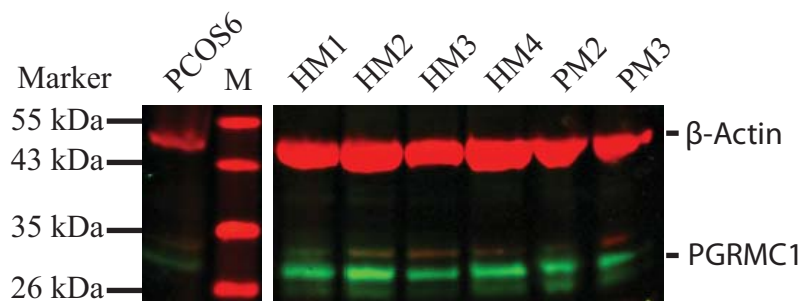

# D

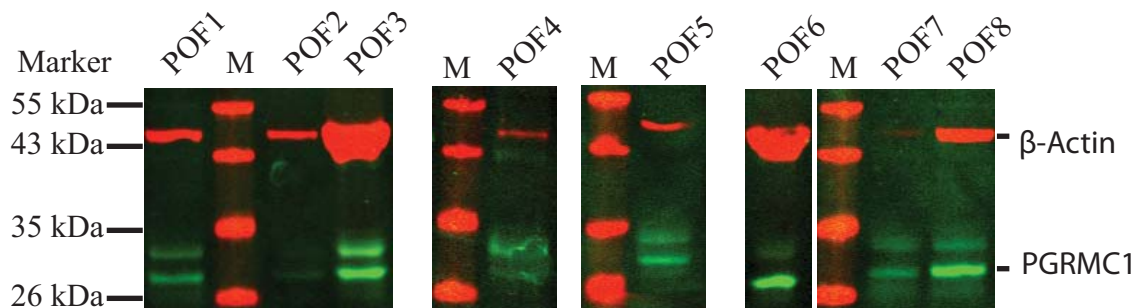

Supplement: MOESM1 [file 9568576]
